# Supplementary material for: Technical note: A weighing forest floor grid lysimeter
Source: Copernicus journal article supplement (doi:10.5194/hess-29-2309-2025), 2025-05-26
Supplement: Supplementary file 1 [file hess-29-2309-2025-supplement.pdf]

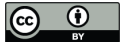

*Supplement of*

## **Technical note: A weighing forest floor grid lysimeter**

**Heinke Paulsen and Markus Weiler**

*Correspondence to:* Heinke Paulsen ([heinke.paulsen@hydrology.uni-freiburg.de](mailto:heinke.paulsen@hydrology.uni-freiburg.de))

The copyright of individual parts of the supplement might differ from the article licence.

# Supplement

## Temperature and stability test of load cells

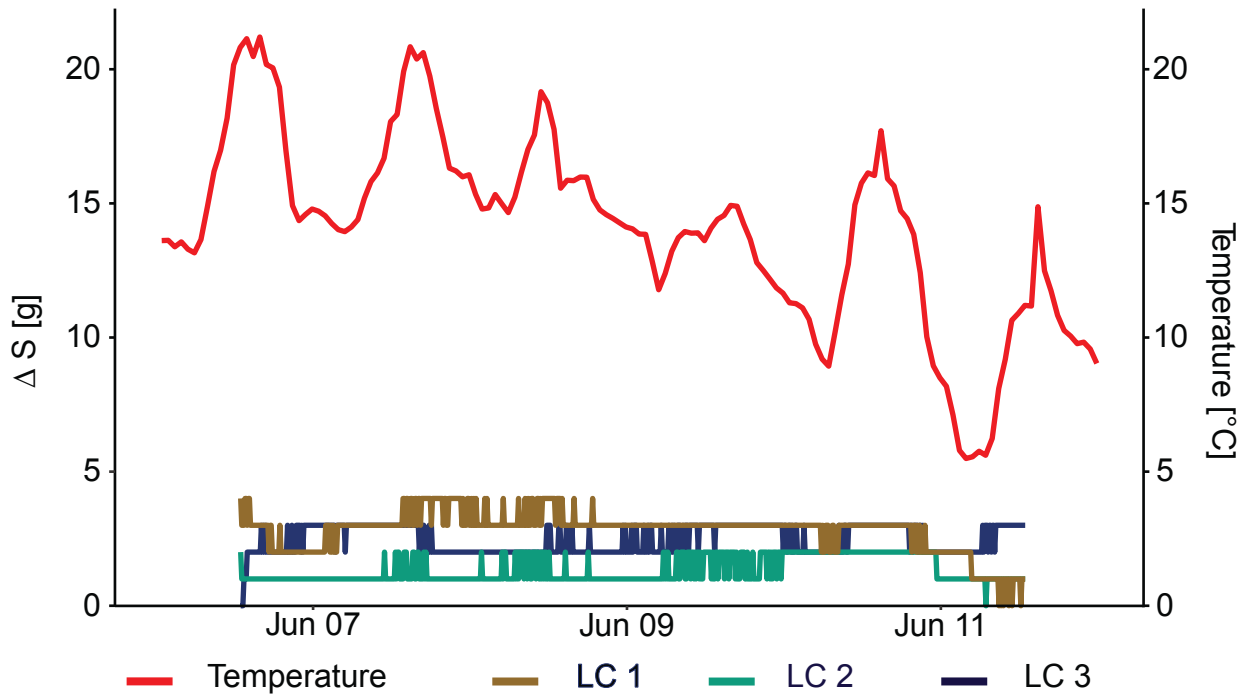

**Figure S1: Weight change of three different loadcells (g) loaded with 3 different masses (687, 704, 705 g) and corresponding air temperature (°C).**

We performed a temperature and stability test of the load cells. Therefore we loaded three LCs separately with masses between 687 and 705 g over a time period of a week under field conditions and measured the weight in a 10-minute time step. Figure S1 shows that air temperature ranged between 5.5 and 21.2 °C. The change in weight was rather small with a maximum of 4 g for LC 3, which corresponds to an error of 0.4 % which is quite small. This is why we state that there is no temperature dependence of the weight detected by the loadcells, but the diurnal variations in our data derive from unprecise placing of the container on the loadcells and shifting of the box due to thermal expansion.
